# Supplementary material
Source: MDPI journal article supplement (https://www.mdpi.com/2227-9717/8/8/983)
Supplement: s1 [file s1]

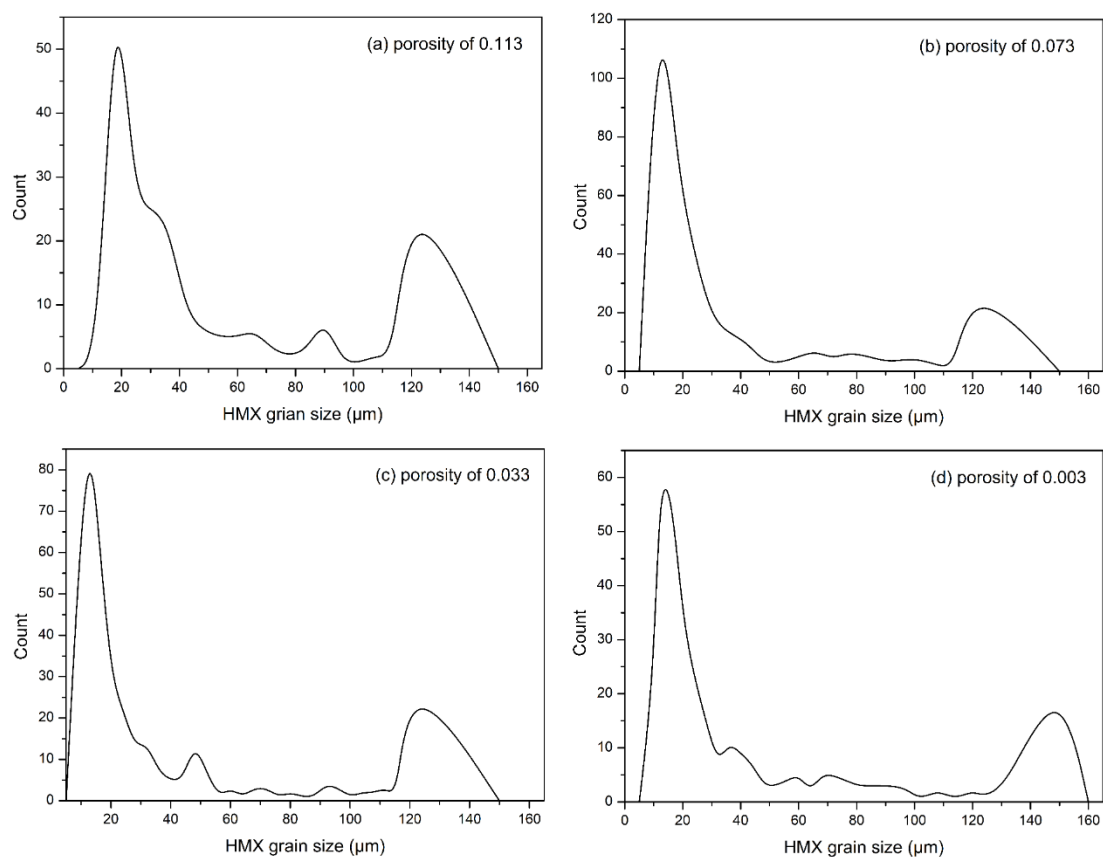

**Figure S1.** Particle size distribution of Octahydro-1,3,5,7-Tetranitro-1,2,3,5-Tetrazocine (HMX) grains in the configuration for different porosities.

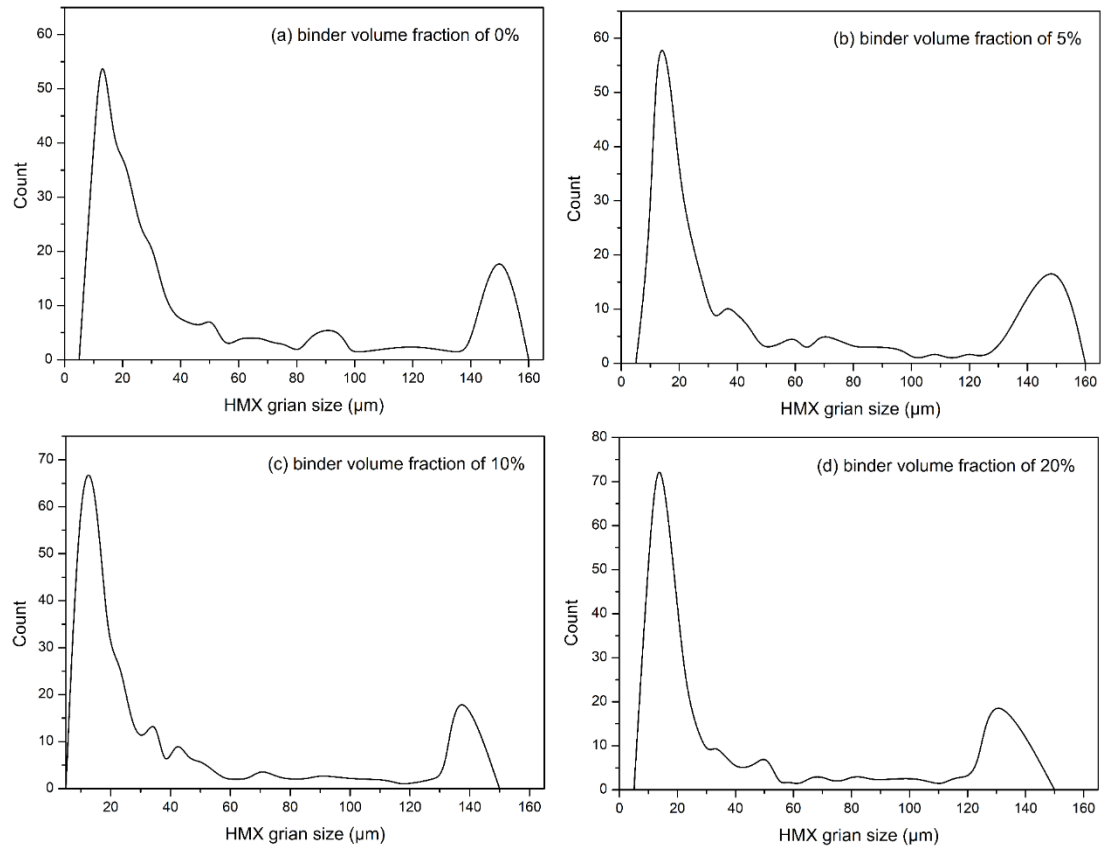

**Figure S2.** Particle size distribution of HMX grains in the configuration for different binder volume fractions.
